# Supplementary material for: The phenanthridinebiguanides efficiently differentiate between dGdC, dAdT and rArU sequences by two independent, sensitive spectroscopic methods
Source: Royal Society of Chemistry journal article supplement (doi:10.1039/c1mb05030c), 2011-03-22
Supplement: c1mb05030c.pdf [file c1mb05030c.pdf]

## SUPPLEMENTARY MATERIAL:

**The phenanthridine biguanides efficiently differentiate between dGdC, dAdT and rArU sequences by two independent, sensitive spectroscopic methods.**

*Marijana Radić Stojković, Snežana Miljanić, Katarina Mišković, Ljubica Glavaš-Obrovac, Ivo Piantanida\**

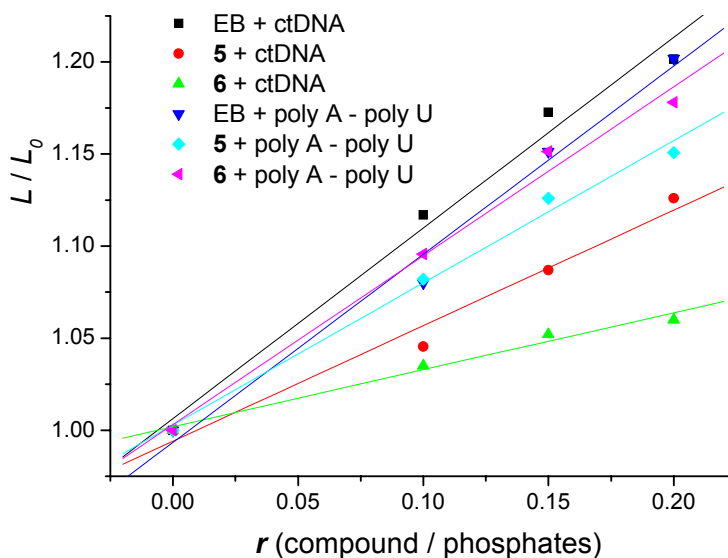

**Figure S1.** Relative ctDNA and poly A – poly U helix length extension ( $L/L_0$ ) vs. ratio  $r_{[\text{compound}]} / [\text{polynucleotide}]$  plot for **EB**, **5** and **6** at pH 7.0, sodium cacodylate buffer,  $I = 0.05 \text{ mol dm}^{-3}$ . Results:  $\alpha = 0.62 \pm 0.06$  (for **5**),  $0.31 \pm 0.03$  (for **6**) and  $1.04 \pm 0.09$  (**EB**) with ctDNA;  $\alpha = 0.77 \pm 0.05$  (for **5**),  $0.91 \pm 0.06$  (for **6**) and  $1.02 \pm 0.08$  (**EB**) with poly A – poly U.

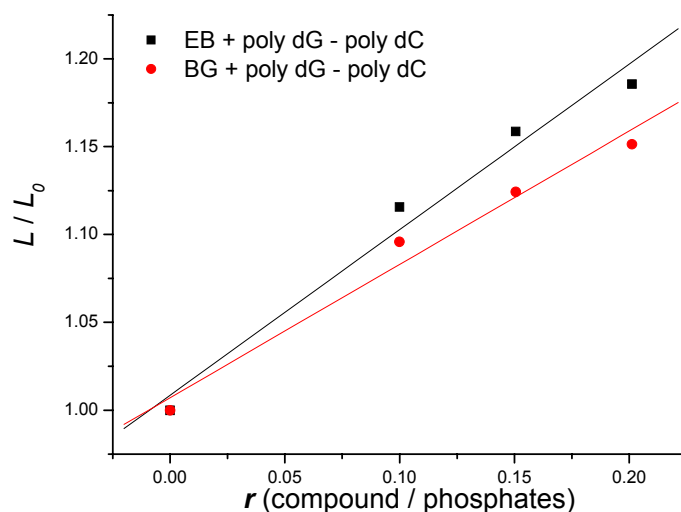

**Figure S2.** Relative poly dG - poly dC helix length extension ( $L/L_0$ ) vs. ratio  $r_{[\text{compound}]} / [\text{polynucleotide}]$  plot for **EB** and **5** at pH 7.0, sodium cacodylate buffer,  $I = 0.05 \text{ mol dm}^{-3}$ . Result:  $\alpha_5/\alpha_{\text{EB}} = 0.805$ .

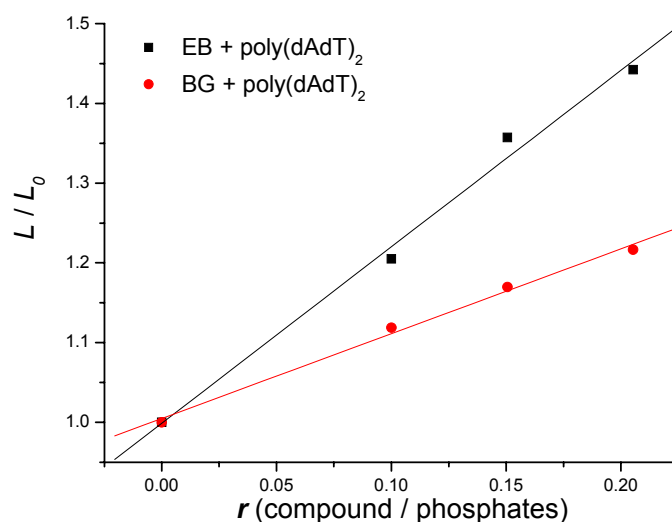

**Figure S3.** Relative poly(dAdT)<sub>2</sub> helix length extension ( $L/L_0$ ) vs. ratio  $r_{[\text{compound}]} / [\text{polynucleotide}]$  plot for **EB** and **5** at pH 7.0, sodium cacodylate buffer,  $I = 0.05 \text{ mol dm}^{-3}$ . Result:  $\alpha_5/\alpha_{\text{EB}} = 0.48$ .

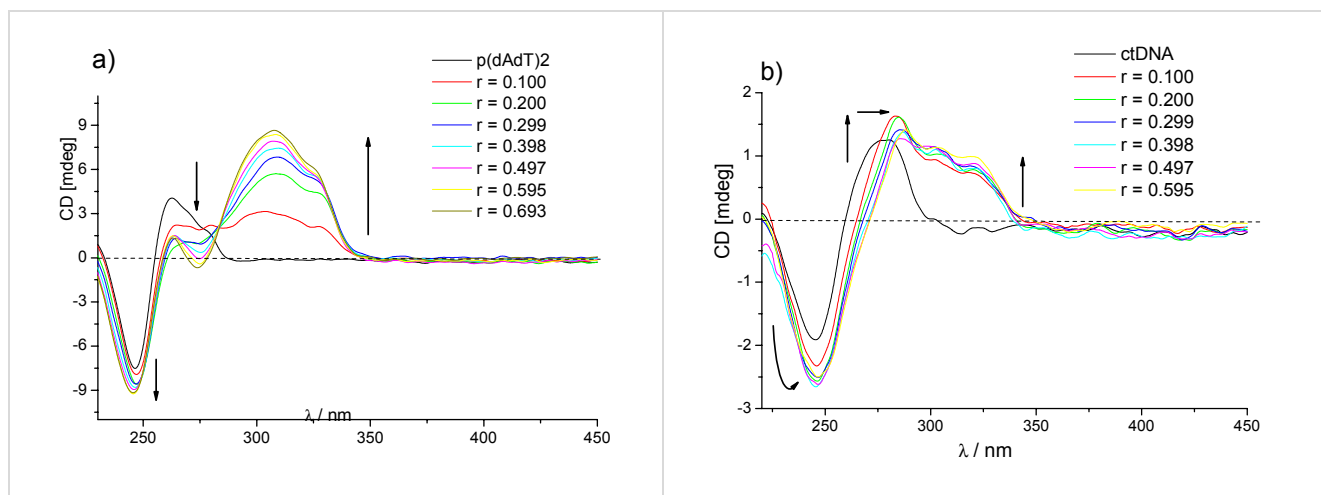

**Figure S4.** CD titrations of a) poly (dAdT)<sub>2</sub> and b) ctDNA ( $c = 3.0 \times 10^{-5} \text{ mol dm}^{-3}$ ) with **6** at molar ratios  $r = [\text{compound}] / [\text{polynucleotide}]$  (pH 5.0, citric acid/NaOH buffer,  $I = 0.03 \text{ mol dm}^{-3}$ ).

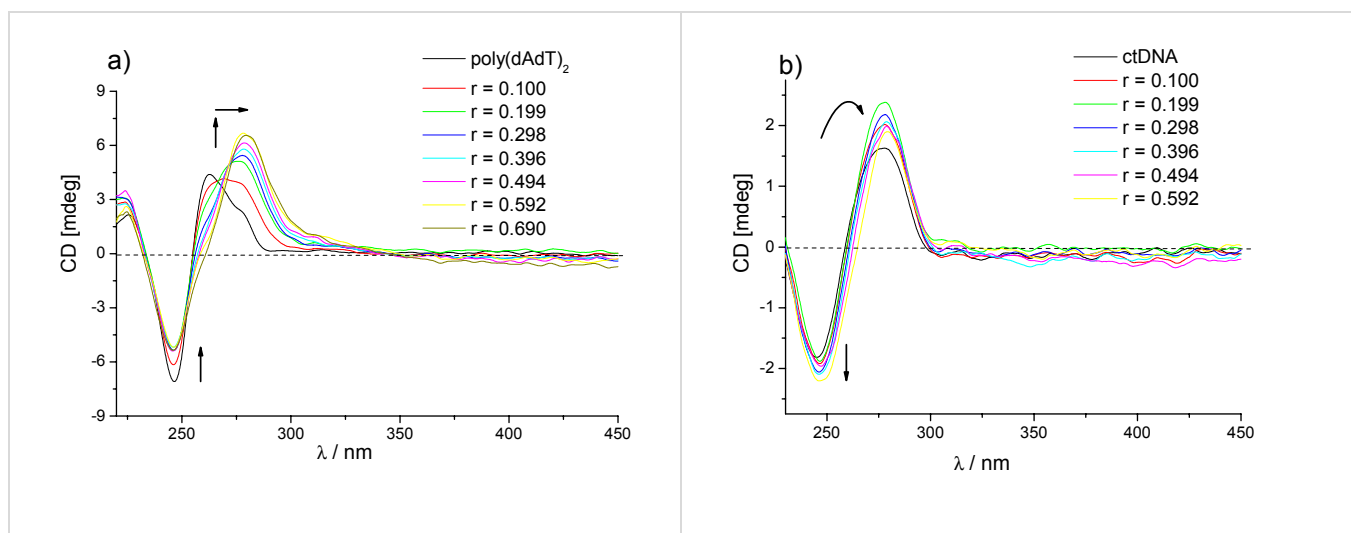

**Figure S5.** CD titrations of a) poly (dAdT)<sub>2</sub> and b) ctDNA ( $c = 3.0 \times 10^{-5} \text{ mol dm}^{-3}$ ) with **5** at molar ratios  $r = [\text{compound}] / [\text{polynucleotide}]$  (pH 5.0, citric acid/NaOH buffer,  $I = 0.03 \text{ mol dm}^{-3}$ ).

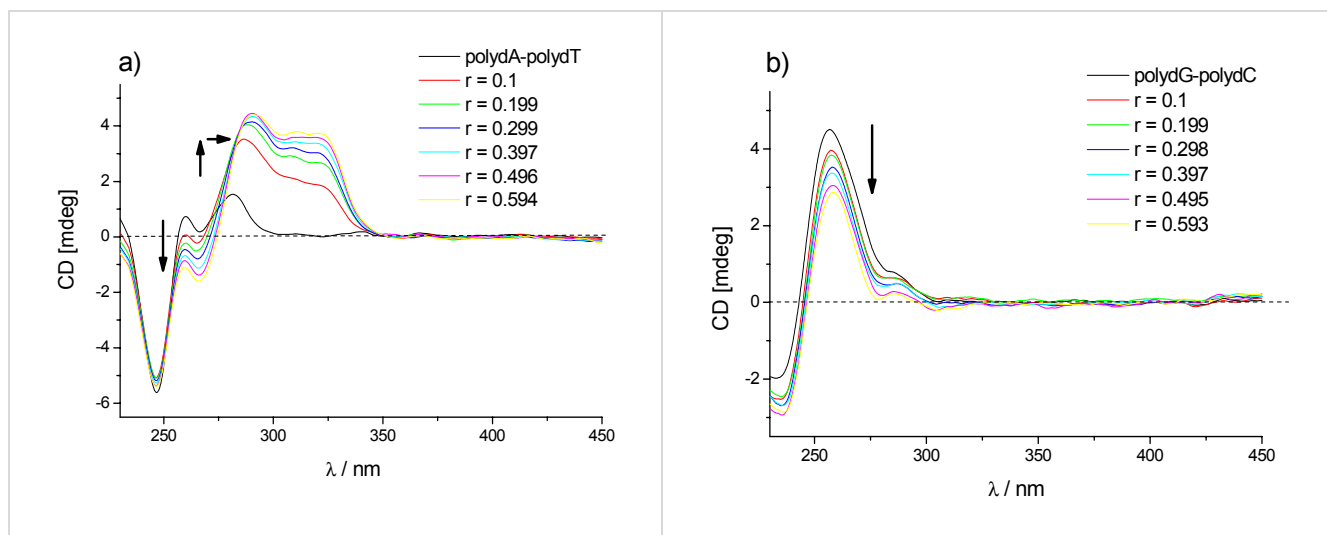

**Figure S6.** CD titrations of a) poly dA – poly dT and b) poly dG – poly dC ( $c = 3.0 \times 10^{-5}$  mol dm $^{-3}$ ) with **6** at molar ratios  $r = [\text{compound}] / [\text{polynucleotide}]$  (pH 7.0, buffer sodium cacodylate,  $I=0.05$  mol dm $^{-3}$ ).

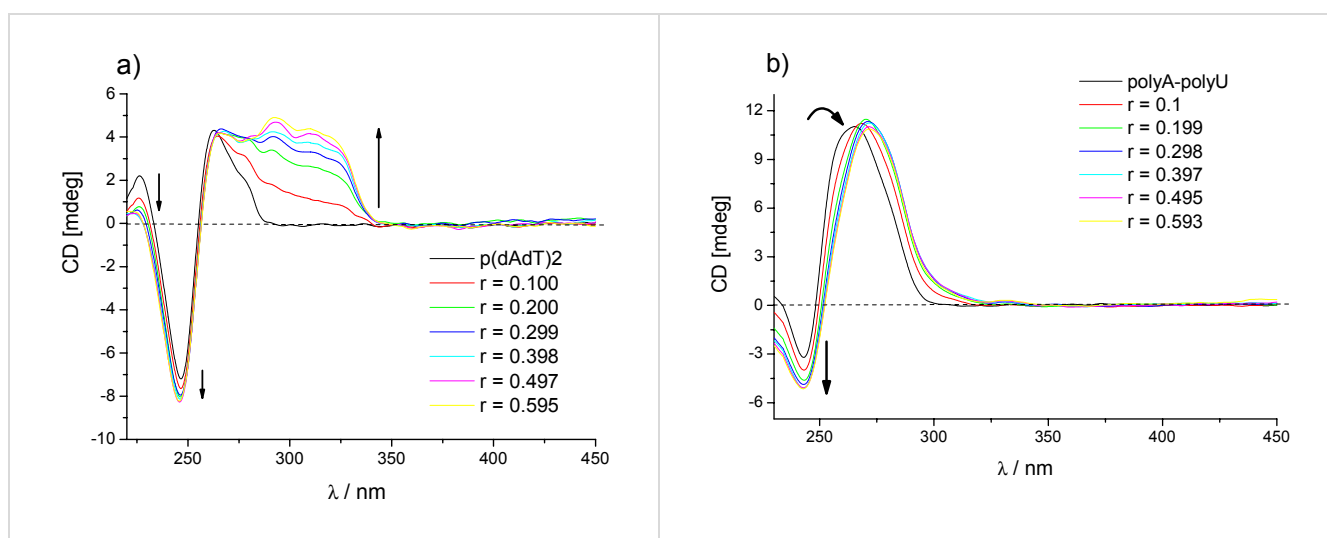

**Figure S7.** CD titrations of a) poly (dAdT) $_2$  and b) poly A – poly U ( $c = 3.0 \times 10^{-5}$  mol dm $^{-3}$ ) with **6** at molar ratios  $r = [\text{compound}] / [\text{polynucleotide}]$  (pH 7.0, buffer sodium cacodylate,  $I=0.05$  mol dm $^{-3}$ ).

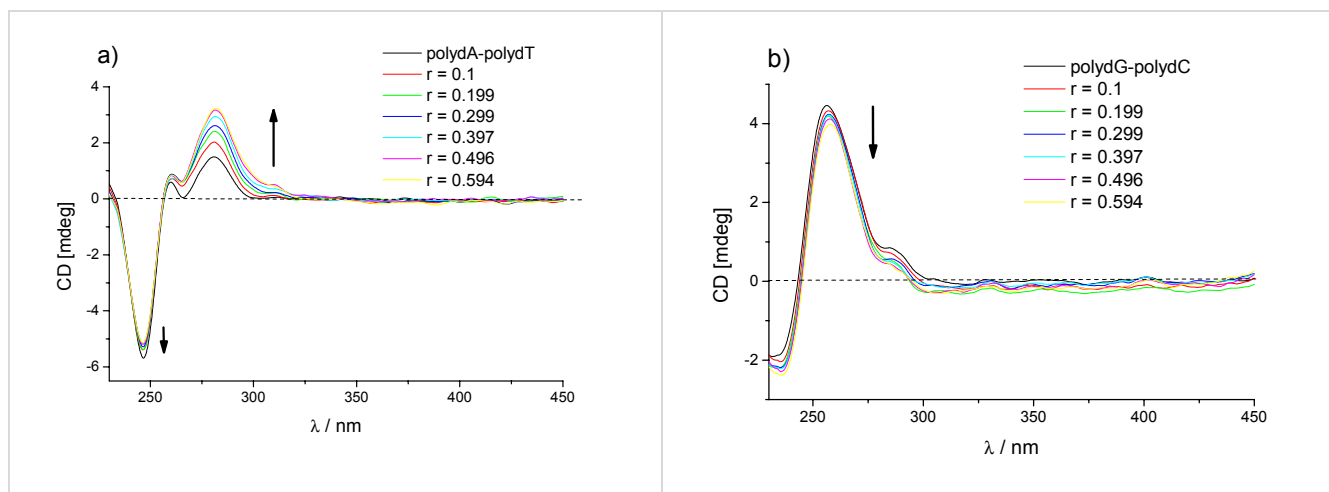

**Figure S8.** CD titrations of a) poly dA – poly dT b) poly dG – poly dC ( $c = 3.0 \times 10^{-5}$  mol  $\text{dm}^{-3}$ ) with **5** at molar ratios  $r = [\text{compound}] / [\text{polynucleotide}]$  (pH 7.0, buffer sodium cacodylate,  $I=0.05$  mol $\text{dm}^{-3}$ ).

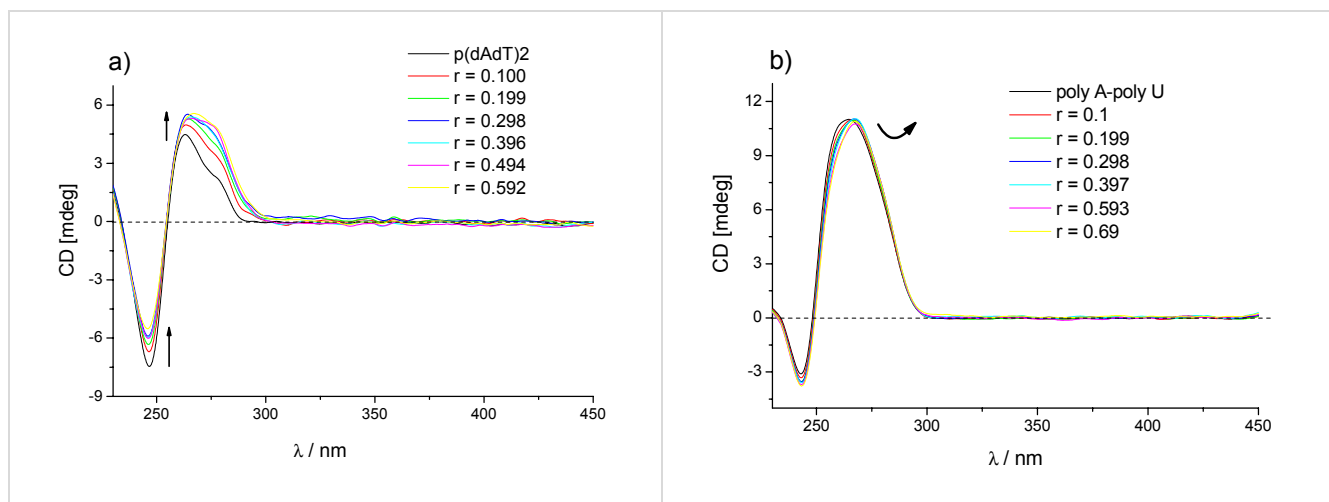

**Figure S9.** CD titrations of a) poly (dAdT)<sub>2</sub> and b) poly A – poly U ( $c = 3.0 \times 10^{-5}$  mol  $\text{dm}^{-3}$ ) with **5** at molar ratios  $r = [\text{compound}] / [\text{polynucleotide}]$  (pH 7.0, buffer sodium cacodylate,  $I=0.05$  mol $\text{dm}^{-3}$ ).

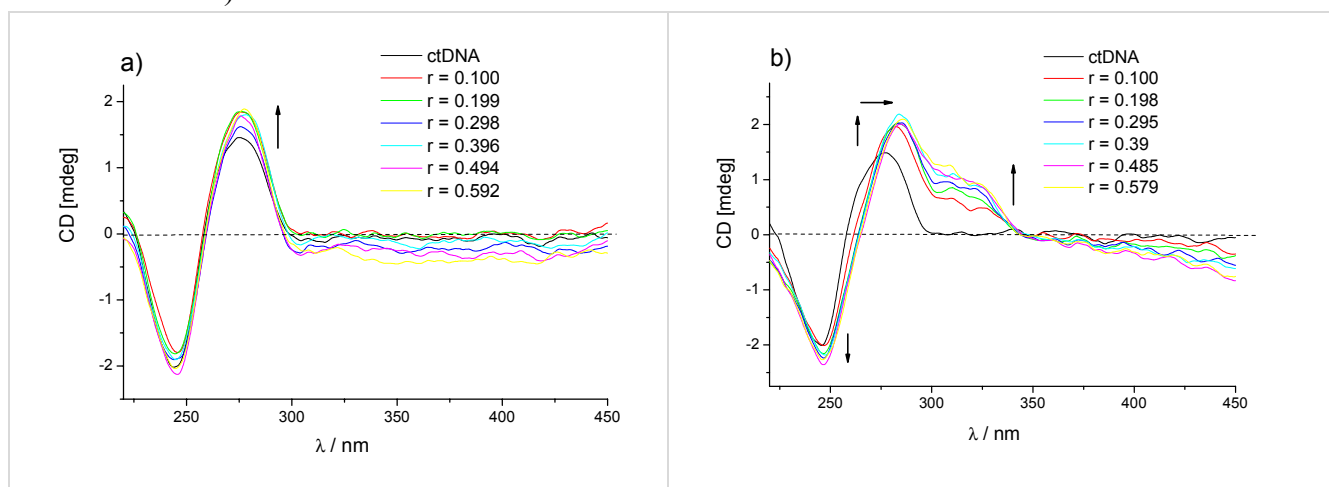

**Figure S10.** CD titrations of ctDNA ( $c = 3.0 \times 10^{-5}$  mol  $\text{dm}^{-3}$ ) with a) **5** and b) **6** at molar ratios  $r = [\text{compound}] / [\text{polynucleotide}]$  (pH 7.0, buffer sodium cacodylate,  $I=0.05$  mol $\text{dm}^{-3}$ ).

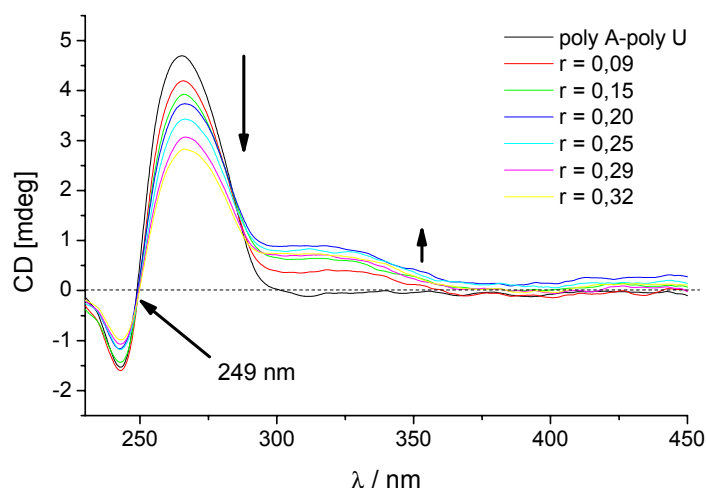

**Figure S11.** CD titration<sup>1</sup> of poly A-poly U ( $c = 1.5 \times 10^{-5} \text{ mol dm}^{-3}$ ) with **9** at molar ratios  $r = [\text{compound}] / [\text{polynucleotide}]$  (pH 5.0, citric acid buffer,  $I = 0.03 \text{ mol dm}^{-3}$ ).

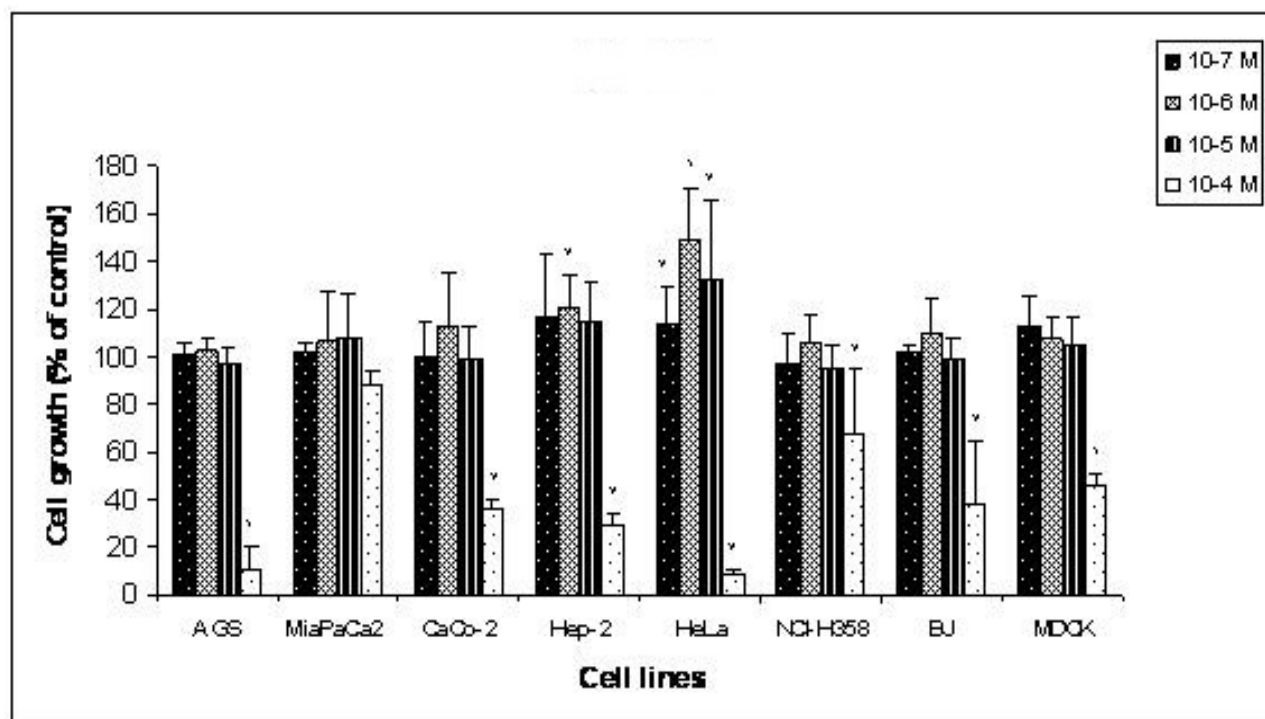

**Figure S12:** Cytotoxic effects of compound **5** on tumor and normal cell lines growth after 72 h of incubation in final concentration range ( $10^{-4}$ –  $10^{-7} \text{ mol/dm}^3$ ). Data are presented as mean value  $\pm$  SD of three independent experiments done in three plicate. Statistically significant change ( $p < 0.05$ ) is presented by (\*).

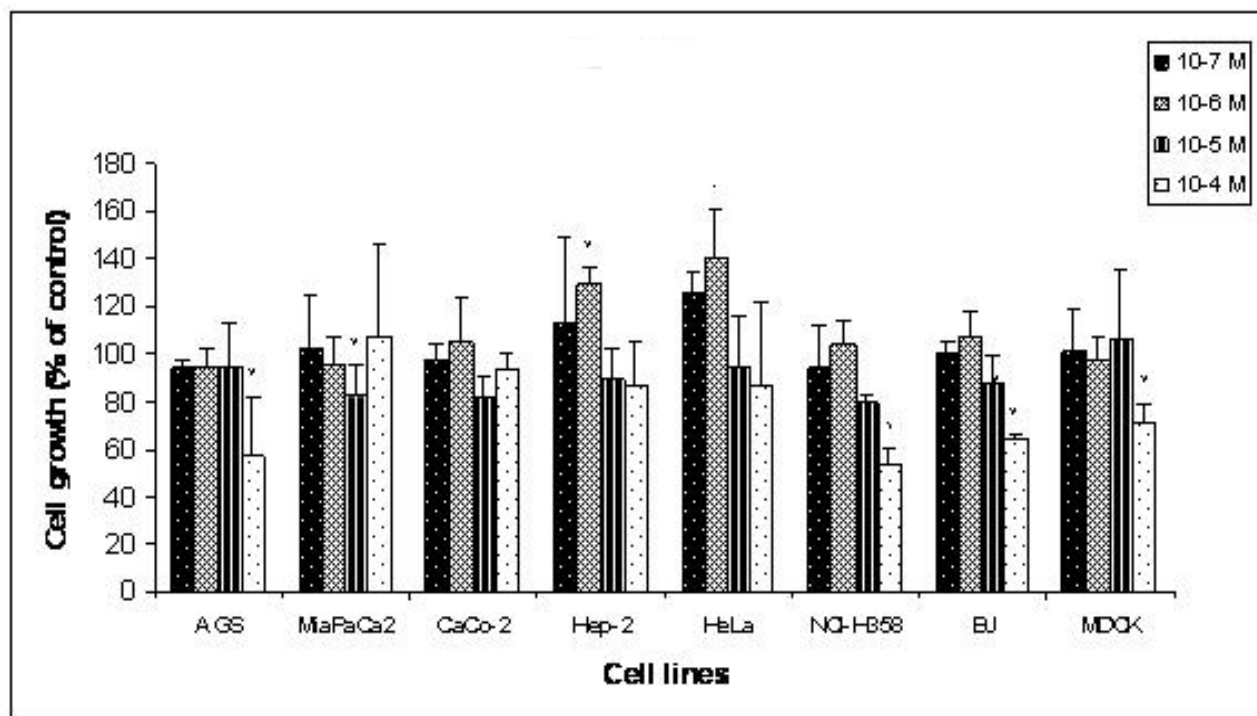

**Figure S13:** Cytotoxic effects of compound **6** on tumor and normal cell lines growth after 72 h of incubation in final concentration range ( $10^{-4}$ –  $10^{-7}$  mol/dm<sup>3</sup>). Data are presented as mean value  $\pm$  SD of three independent experiments done in three plicate. Statistically significant change ( $p < 0.05$ ) is presented by (\*).

**Table S1.** Preliminary assignment of the vibrational bands observed in the SERS spectra of the **5** and **6** and their complexes with ctDNA, [**5,6**]/[DNA] 1/20

| Wavenumber / cm <sup>-1</sup> |                   |          |                   | Assignment                                                    |
|-------------------------------|-------------------|----------|-------------------|---------------------------------------------------------------|
| <b>5</b>                      | <b>5/DNA 1/20</b> | <b>6</b> | <b>6/DNA 1/20</b> |                                                               |
| 1623                          | 1624              | 1621     | 1620              | $\nu$ ring ( $\nu$ CC/CN), $\nu$ CN                           |
| 1616 sh                       | 1612              |          |                   | $\nu$ CN, $\delta$ NH <sub>2</sub>                            |
| 1582                          | 1583              | 1591 sh  | 1592 sh           | $\nu$ ring ( $\nu$ CC/CN)                                     |
| 1536                          | 1537              | 1543     | 1542              | $\nu$ ring ( $\nu$ CC)                                        |
| 1467                          | 1466              | 1465 sh  | 1465 sh           | $\delta_{as}$ CH <sub>3</sub>                                 |
|                               |                   | 1449     | 1448              | $\nu$ ring ( $\nu$ CC)                                        |
| 1422                          | 1419 sh           | 1426     | 1419 sh           | $\nu_s$ CNC, $\nu$ CN <sub>3</sub> , $\delta$ NH <sub>2</sub> |
|                               |                   |          | 1414              | $\nu$ ring ( $\nu$ CC)                                        |
| 1391                          | 1392              | 1389     | 1388              | $\nu$ ring ( $\nu$ CC)                                        |
| 1365                          | 1366              | 1361     | 1362              | $\nu$ ring ( $\nu$ CC), $\delta_s$ CH <sub>3</sub>            |
| 1345                          | 1346              | 1328 sh  | 1328 sh           | $\nu$ ring ( $\nu$ CC)                                        |
| 1298                          | 1300              | 1277     | 1284              | $\delta_{ip}$ CH, $\delta$ NH                                 |
| 1258                          | 1257              |          |                   | $\delta_{ip}$ CH                                              |
| 1229                          | 1227              | 1221     | 1222              | $\delta_{ip}$ CH, $\nu_{as}$ CNC, $\nu$ CN <sub>3</sub>       |

|        |        |        |        |                                                       |
|--------|--------|--------|--------|-------------------------------------------------------|
| 1210   | 1212   |        |        | $\delta_{ip}$ CH, $\delta$ NH                         |
|        |        | 1185   |        | $\delta_{ip}$ CH                                      |
| 1154   | 1157   | 1154   | 1154   | $\delta_{ip}$ CH                                      |
|        |        | 1138   | 1137   | $\delta_{ip}$ CH                                      |
| 1076   | 1081   | 1079   | 1080   | $\delta$ NH <sub>2</sub> , $\nu$ CN <sub>3</sub>      |
| 1039   | 1039   |        |        | $\nu$ ring ( $\nu$ CC)                                |
| 1007   | 1004   |        |        | $\nu$ CN <sub>3</sub> , $\delta$ NH <sub>2</sub>      |
|        |        | 971    | 966 sh | $\delta$ ring                                         |
| 952    | 952    | 952 sh | 954    | $\delta$ ring                                         |
| 923    | 924    | 911    | 911    | $\delta$ CNC, $\nu$ CN, $\delta$ NH <sub>2</sub>      |
| 893    | 891    |        |        | $\nu$ ring ( $\nu$ CC)                                |
| 869    | 870    | 870    | 867    | $\nu$ ring ( $\nu$ CC), $\delta_{oop}$ CH             |
| 837    |        |        |        | $\delta$ ring                                         |
|        |        | 797    | 797    | $\delta$ ring, $\delta$ CNC                           |
| 727    | 729    | 722    | 729    | $\delta$ ring                                         |
|        |        | 706 sh | 708    | $\delta$ ring                                         |
|        |        | 696    | 696    | $\delta$ ring                                         |
| 655    | 655    | 679    | 679    | $\delta$ ring                                         |
| 617    | 618 sh |        |        | $\delta$ ring                                         |
| 588    | 600    |        |        | $\delta$ NH <sub>2</sub> , $\delta$ NH, $\delta$ ring |
| 513 sh | 516    | 520    | 520    | $\delta$ CNC, $\delta$ ring                           |
| 506    | 504    |        |        | $\delta$ ring                                         |
| 462    | 460 sh | 463    | 459    | $\delta_{as}$ CNC                                     |
| 448    | 447    | 435    | 435    | $\delta$ ring                                         |
| 421    | 421    | 395    | 395    | $\delta$ CN <sub>3</sub> , $\delta$ NH <sub>2</sub>   |
| 341    | 339    | 328    | 326 sh | $\delta_s$ CNC                                        |
| 227    | 224    | 227    | 223    | $\nu$ Ag–N                                            |

Abbreviations: sh, shoulder;  $\nu$ , stretching;  $\delta$ , deformation; s, symmetrical; as, antisymmetrical; ip, in plane; oop, out of plane.

<sup>1</sup> M. Radić Stojković, I. Piantanida, Tetrahedron 64 (2008) 7807-7814
